# Supplementary material for: Increased Regulatory T Cells Precede the Development of Bronchopulmonary Dysplasia in Preterm Infants
Source: PubMed Central journal article supplement (PMC7554370; doi:10.3389/fimmu.2020.565257), 2020-09-30
Supplement: Data_Sheet_1.pdf [file Data_Sheet_1.pdf]

## *Supplementary Material*

### 1 Supplementary Figures and Tables

#### 1.1 Supplementary Tables

**Supplemental table 1:** Treg frequencies negatively correlate with gestational age until 21 days of life and converge at 28 days of life (linear correlation with gestational age;  $r_s$ : Spearman's rank correlation coefficient; type I error level was adjusted for 5 of 10 tests with Šidák-Holm).

| Day of life | n   | Estimate<br>(p value) | Adjusted<br>type I<br>error level | $r_s$  |
|-------------|-----|-----------------------|-----------------------------------|--------|
| 1-3         | 284 | -0.250 (< 0.0001)     | 0.0051                            | -0.378 |
| 4-10        | 231 | -0.340 (< 0.0001)     | 0.0057                            | -0.336 |
| 11-17       | 179 | -0.246 (0.0007)       | 0.0064                            | -0.267 |
| 18-24       | 139 | -0.13 (0.0353)        | 0.0127                            | -0.158 |
| 25-31       | 119 | -0.074 (0.3498)       | 0.0170                            | -0.037 |

#### 1.2 Supplementary Figures

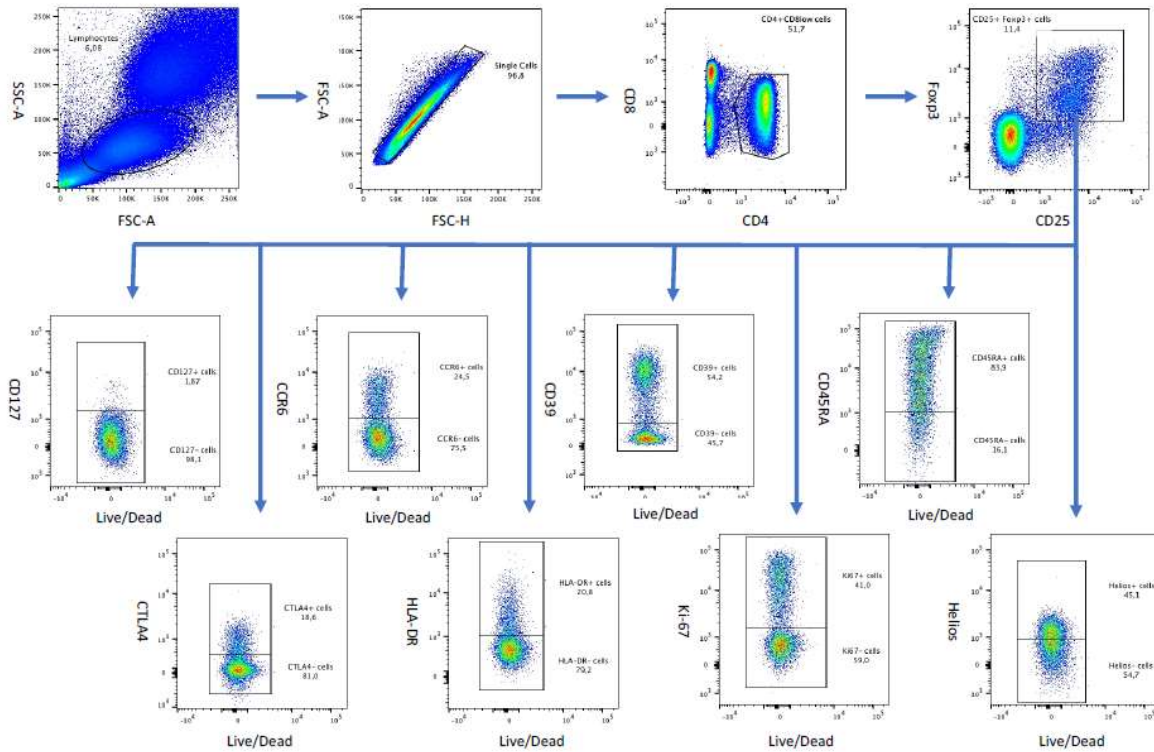

**Supplemental figure 1: Gating strategy for Treg phenotyping.** Representative gating in preterm infants from day 8 of life. We gated the following markers as percentage of CD4+ CD25+ and FoxP3+ regulatory T cells: alive and HLA-DR+, CD45RA+, CTLA-4+, CD39+, CCR6+, Helios+, and Ki-67+ cells. Single antibody stainings were used to calculate the compensations. Fluorescence minus one (FMO) controls were used to establish gating boundaries and to identify any background spread of fluorochromes.

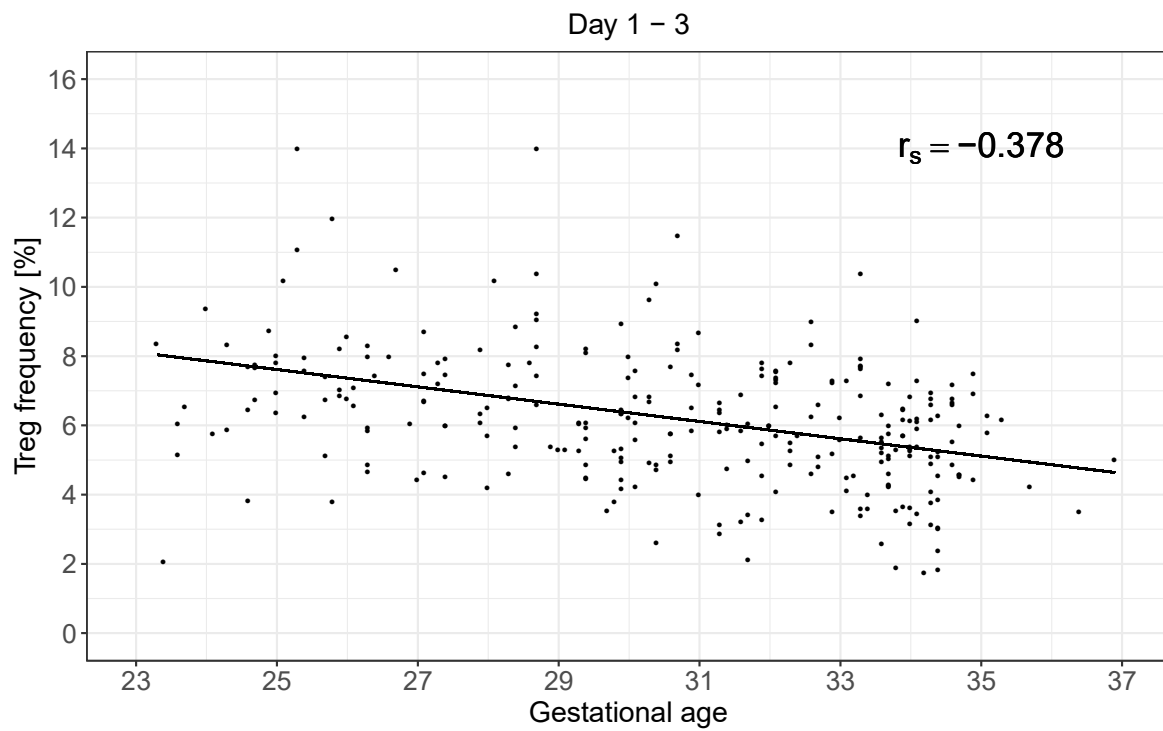

**Supplemental figure 2: Treg frequencies negatively correlate with gestational age on day of life 1 to 3 (-0.25,  $p < 0.0001$ ;  $r_s$ : Spearman's rank correlation coefficient).**

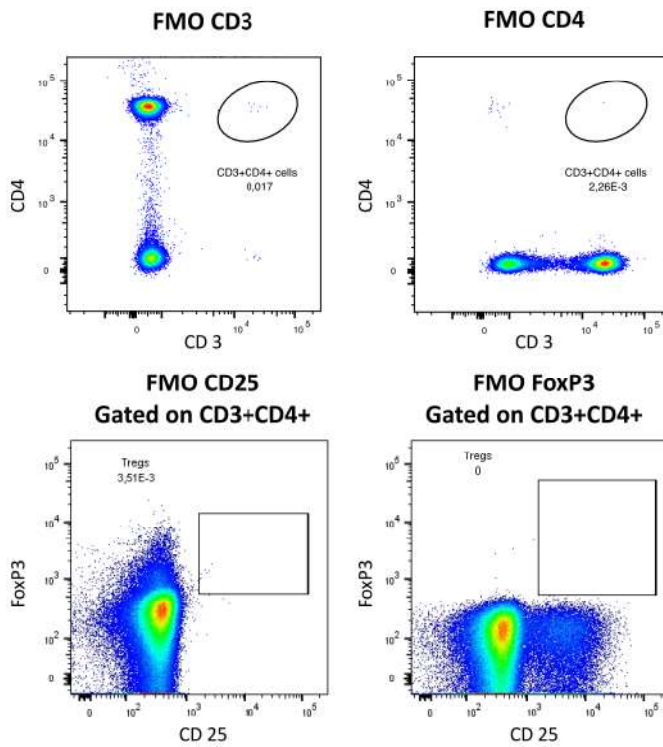

**Supplemental figure 3: Fluorescence Minus One (FMO) Controls for Treg panel.** Representative gating of FMO controls in preterm infants from day 3 of life. We gated the percentage of CD3+CD4+ CD25+ and FoxP3+ regulatory T cells and used these controls to establish gating boundaries and to identify any background spread of fluorochromes.

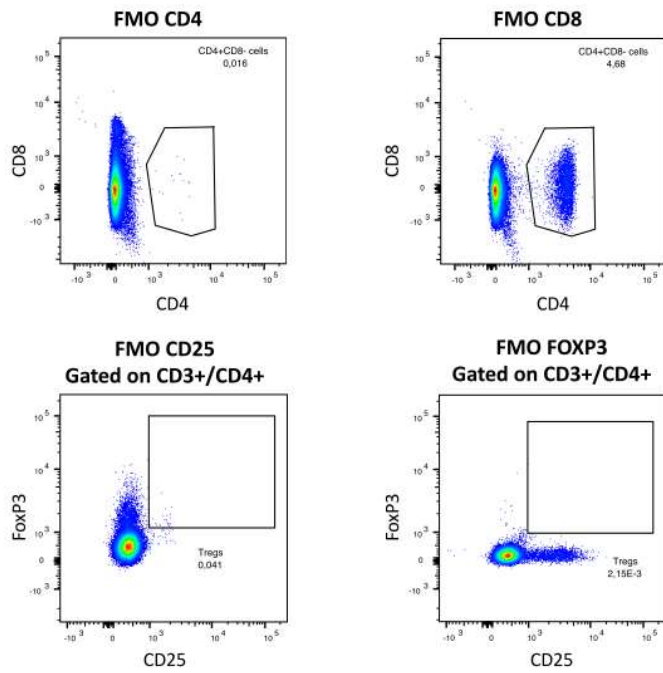

**FMOs gated on CD4<sup>+</sup>/CD8<sup>-</sup>/CD25<sup>+</sup>/FoxP3<sup>+</sup>**

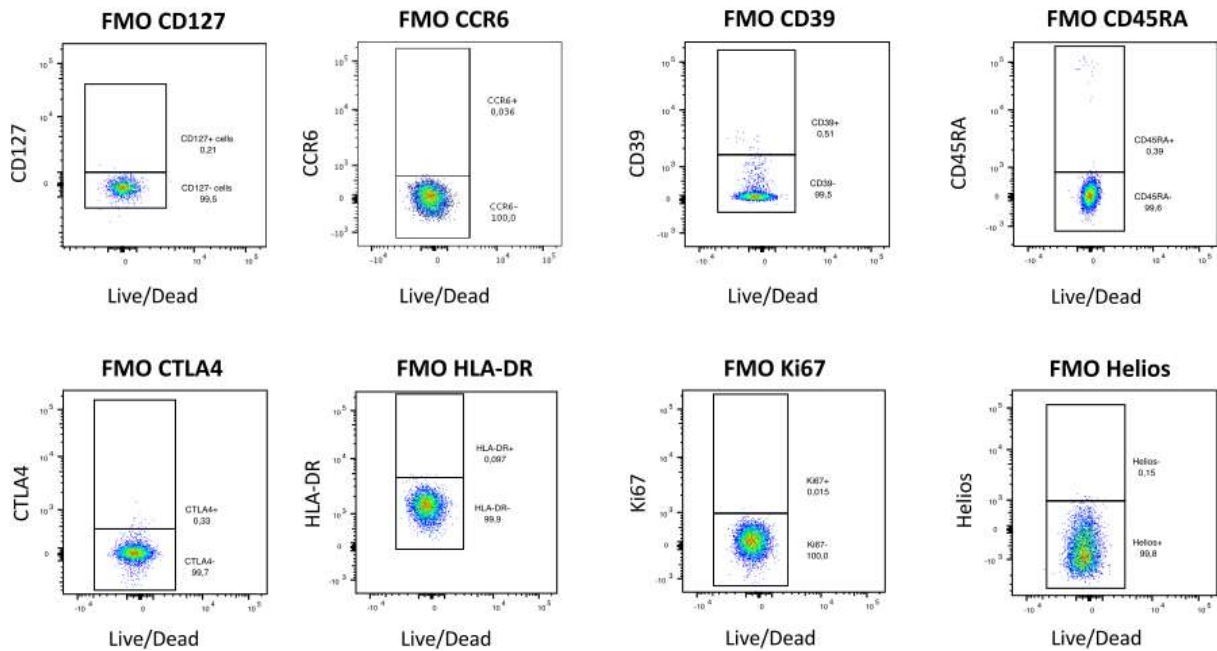

**Supplemental figure 4: Fluorescence minus one (FMO) controls for Treg phenotyping panel.** Representative gating of FMO controls in preterm infants from day 3 of life. We gated the following markers as percentage of CD4<sup>+</sup> CD25<sup>+</sup> and FoxP3<sup>+</sup> regulatory T cells: HLA-DR<sup>+</sup>, CD45RA<sup>+</sup>, CTLA-4<sup>+</sup>, CD39<sup>+</sup>, CCR6<sup>+</sup>, Helios<sup>+</sup>, and Ki-67<sup>+</sup> cells and used these controls to establish gating boundaries and to identify any background spread of fluorochromes.
